# Supplementary material for: Pan-Resistome Characterization of Uropathogenic Escherichia coli and Klebsiella pneumoniae Strains Circulating in Uganda and Kenya, Isolated from 2017–2018
Source: MDPI journal article supplement (doi:10.3390/antibiotics10121547), 2021-12-17
Supplement: s1 [file s1]

(a)

|       |       |       |       |       |       |       |       |       |       |       |       |       |       |       |       |       |            |        |        |        |        |            |
|-------|-------|-------|-------|-------|-------|-------|-------|-------|-------|-------|-------|-------|-------|-------|-------|-------|------------|--------|--------|--------|--------|------------|
| 0     | 223   | 255   | 243   | 289   | 314   | 275   | 271   | 286   | 1326  | 312   | 1680  | 1281  | 743   | 265   | 200   | 1342  | 1363       | 6774   | 11578  | 11616  | 1799   | 103        |
| 223   | 0     | 221   | 225   | 267   | 280   | 209   | 268   | 269   | 1314  | 290   | 1670  | 1265  | 746   | 236   | 188   | 1320  | 1350       | 6767   | 11566  | 11594  | 1763   | 11         |
| 255   | 221   | 0     | 226   | 282   | 307   | 265   | 273   | 258   | 1318  | 293   | 1659  | 1270  | 745   | 225   | 197   | 1334  | 1371       | 6766   | 11574  | 11601  | 1784   | 12         |
| 243   | 225   | 226   | 0     | 254   | 273   | 216   | 247   | 262   | 1313  | 260   | 1661  | 1238  | 731   | 213   | 175   | 1320  | 1348       | 6771   | 11573  | 11616  | 1775   | 20         |
| 289   | 267   | 282   | 254   | 0     | 301   | 286   | 301   | 300   | 1373  | 309   | 1721  | 1292  | 765   | 283   | 239   | 1374  | 1391       | 6812   | 11614  | 11647  | 1820   | 23         |
| 314   | 280   | 307   | 273   | 301   | 0     | 295   | 308   | 317   | 1382  | 338   | 1698  | 1307  | 796   | 312   | 264   | 1389  | 1412       | 6839   | 11629  | 11680  | 1847   | 24         |
| 275   | 209   | 265   | 216   | 286   | 295   | 0     | 276   | 297   | 1343  | 304   | 1701  | 1272  | 744   | 266   | 213   | 1342  | 1370       | 6792   | 11582  | 11630  | 1799   | 5          |
| 271   | 268   | 273   | 247   | 301   | 308   | 276   | 0     | 263   | 1321  | 321   | 1698  | 1269  | 744   | 246   | 224   | 1353  | 1394       | 6801   | 11605  | 11643  | 1817   | 63         |
| 286   | 269   | 258   | 262   | 300   | 317   | 297   | 263   | 0     | 1358  | 303   | 1721  | 1282  | 777   | 259   | 237   | 1366  | 1391       | 6800   | 11599  | 11645  | 1822   | 64         |
| 1326  | 1314  | 1318  | 1313  | 1373  | 1382  | 1343  | 1321  | 1358  | 0     | 1371  | 1355  | 1345  | 1344  | 1291  | 1276  | 1475  | 910        | 6975   | 11310  | 11140  | 1335   | 67         |
| 312   | 290   | 293   | 260   | 309   | 338   | 304   | 321   | 303   | 1371  | 0     | 1744  | 1315  | 808   | 279   | 246   | 1367  | 1399       | 6784   | 11640  | 11667  | 1838   | 6          |
| 1680  | 1670  | 1659  | 1661  | 1721  | 1698  | 1701  | 1698  | 1721  | 1355  | 1744  | 0     | 1525  | 1513  | 1668  | 1652  | 1657  | 1145       | 7075   | 11359  | 10647  | 1678   | 71         |
| 1281  | 1265  | 1270  | 1238  | 1292  | 1307  | 1272  | 1269  | 1282  | 1345  | 1315  | 1525  | 0     | 995   | 1227  | 1229  | 1122  | 1350       | 6646   | 11549  | 11475  | 1819   | 72         |
| 743   | 746   | 745   | 731   | 765   | 796   | 744   | 744   | 777   | 1344  | 808   | 1513  | 995   | 0     | 732   | 704   | 1150  | 1386       | 6624   | 11584  | 11523  | 1857   | 73         |
| 265   | 236   | 225   | 213   | 283   | 312   | 266   | 246   | 259   | 1291  | 279   | 1668  | 1227  | 732   | 0     | 207   | 1317  | 1340       | 6741   | 11581  | 11614  | 1775   | 87         |
| 200   | 188   | 197   | 175   | 239   | 264   | 213   | 224   | 237   | 1276  | 246   | 1652  | 1229  | 704   | 207   | 0     | 1275  | 1313       | 6731   | 11541  | 11580  | 1752   | 97         |
| 1342  | 1320  | 1334  | 1320  | 1374  | 1389  | 1342  | 1353  | 1366  | 1475  | 1367  | 1657  | 1122  | 1150  | 1317  | 1275  | 0     | 1489       | 6811   | 11634  | 11587  | 1928   | BN19       |
| 1363  | 1350  | 1371  | 1348  | 1391  | 1412  | 1370  | 1394  | 1391  | 910   | 1399  | 1145  | 1350  | 1386  | 1340  | 1313  | 1489  | 0          | 6764   | 11145  | 10996  | 1092   | CP023853.1 |
| 6774  | 6767  | 6766  | 6771  | 6812  | 6839  | 6792  | 6801  | 6800  | 6975  | 6784  | 7075  | 6646  | 6624  | 6741  | 6731  | 6811  | 6764       | 0      | 12594  | 12716  | 7017   | JNQU01     |
| 11578 | 11566 | 11574 | 11573 | 11614 | 11629 | 11582 | 11605 | 11599 | 11310 | 11640 | 11359 | 11549 | 11584 | 11581 | 11541 | 11634 | 11145      | 12594  | 0      | 4557   | 11380  | NIDR01     |
| 11616 | 11594 | 11601 | 11616 | 11647 | 11680 | 11630 | 11643 | 11645 | 11140 | 11667 | 10647 | 11475 | 11523 | 11614 | 11580 | 11587 | 10996      | 12716  | 4557   | 0      | 11114  | SDUG01     |
| 1799  | 1763  | 1784  | 1775  | 1820  | 1847  | 1799  | 1817  | 1822  | 1335  | 1838  | 1678  | 1819  | 1857  | 1775  | 1752  | 1928  | 1092       | 7017   | 11380  | 11114  | 0      | SGIW01     |
| 103   | 11    | 12    | 20    | 23    | 24    | 5     | 63    | 64    | 61    | 6     | 11    | 12    | 13    | 81    | 97    | BN19  | CP023853.1 | JNQU01 | NIDR01 | SDUG01 | SGIW01 |            |

ST131

|        |      |      |      |       |        |        |        |        |        |        |
|--------|------|------|------|-------|--------|--------|--------|--------|--------|--------|
| 0      | 7737 | 6036 | 7672 | 5443  | 6021   | 8225   | 6275   | 7646   | 9865   | BIBD01 |
| 7737   | 0    | 7250 | 251  | 9778  | 7340   | 8773   | 8175   | 2070   | 8867   | BN20   |
| 6036   | 7250 | 0    | 7251 | 8381  | 6934   | 9269   | 7805   | 7439   | 9909   | BN37   |
| 7672   | 251  | 7251 | 0    | 9736  | 7267   | 8738   | 8103   | 2009   | 8844   | BN47   |
| 5443   | 9778 | 8381 | 9736 | 0     | 8488   | 10458  | 8651   | 9667   | 12072  | BN49   |
| 6021   | 7340 | 6934 | 7267 | 8488  | 0      | 8033   | 7143   | 7381   | 9575   | CXYF01 |
| 8225   | 8773 | 9269 | 8738 | 10458 | 8033   | 0      | 8587   | 8745   | 10922  | JHDI01 |
| 6275   | 8175 | 7805 | 8103 | 8651  | 7143   | 8587   | 0      | 7897   | 10069  | JMGV01 |
| 7646   | 2070 | 7439 | 2009 | 9667  | 7381   | 8745   | 7897   | 0      | 8765   | LSBS01 |
| 9865   | 8867 | 9909 | 8844 | 12072 | 9575   | 10922  | 10069  | 8765   | 0      | MOZS01 |
| BIBD01 | BN20 | BN37 | BN47 | BN49  | CXYF01 | JHDI01 | JMGV01 | LSBS01 | MOZS01 |        |

ST10

|      |      |      |      |      |      |        |        |        |        |        |        |
|------|------|------|------|------|------|--------|--------|--------|--------|--------|--------|
| 0    | 718  | 733  | 821  | 769  | 783  | 5117   | 5629   | 5906   | 5317   | 5360   | 102    |
| 718  | 0    | 153  | 262  | 242  | 254  | 4651   | 5145   | 5450   | 4881   | 4888   | 105    |
| 733  | 153  | 0    | 265  | 271  | 222  | 4654   | 5134   | 5433   | 4870   | 4879   | 13     |
| 821  | 262  | 265  | 0    | 214  | 187  | 4712   | 5210   | 5513   | 4944   | 4951   | 14     |
| 769  | 242  | 271  | 214  | 0    | 192  | 4728   | 5222   | 5487   | 4942   | 4953   | 15     |
| 783  | 254  | 222  | 187  | 192  | 0    | 4700   | 5204   | 5507   | 4932   | 4941   | 16     |
| 5117 | 4651 | 4654 | 4712 | 4728 | 4700 | 0      | 1673   | 2587   | 1412   | 1457   | AOTA01 |
| 5629 | 5145 | 5134 | 5210 | 5222 | 5204 | 1673   | 0      | 2870   | 1026   | 867    | MINC01 |
| 5906 | 5450 | 5433 | 5513 | 5487 | 5507 | 2587   | 2870   | 0      | 2816   | 2843   | NKDG01 |
| 5317 | 4881 | 4870 | 4944 | 4942 | 4932 | 1412   | 1026   | 2816   | 0      | 957    | SGUH01 |
| 5360 | 4888 | 4879 | 4951 | 4953 | 4941 | 1457   | 867    | 2843   | 957    | 0      | WJRH01 |
| 102  | 105  | 13   | 14   | 15   | 16   | AOTA01 | MINC01 | NKDG01 | SGUH01 | WJRH01 |        |

ST335
