# Supplementary material for: Pan-Resistome Characterization of Uropathogenic Escherichia coli and Klebsiella pneumoniae Strains Circulating in Uganda and Kenya, Isolated from 2017–2018
Source: MDPI journal article supplement (doi:10.3390/antibiotics10121547), 2021-12-17
Supplement: s1 [file s1]

(b)

|        |        |        |        |        |        |        |        |        |        |        |        |        |        |        |        |        |        |        |        |        |        |        |        |        |
|--------|--------|--------|--------|--------|--------|--------|--------|--------|--------|--------|--------|--------|--------|--------|--------|--------|--------|--------|--------|--------|--------|--------|--------|--------|
| 0      | 251    | 4654   | 269    | 305    | 327    | 317    | 291    | 302    | 288    | 322    | 310    | 307    | 237    | 389    | 126342 | 4711   | 4711   | 25328  | 5043   | 5695   | 5440   | 4989   | 4888   | 25     |
| 251    | 0      | 4621   | 248    | 257    | 296    | 274    | 290    | 299    | 283    | 309    | 325    | 305    | 206    | 356    | 126322 | 4679   | 4679   | 25304  | 5019   | 5635   | 5396   | 4949   | 4873   | 26     |
| 4654   | 4621   | 0      | 4625   | 4665   | 4685   | 4679   | 4647   | 4619   | 4615   | 4652   | 4622   | 4635   | 4579   | 4708   | 124320 | 62     | 62     | 24519  | 3575   | 4346   | 3998   | 3528   | 3311   | 27     |
| 269    | 248    | 4625   | 0      | 271    | 290    | 267    | 236    | 272    | 260    | 284    | 291    | 275    | 202    | 349    | 126311 | 4683   | 4683   | 25302  | 4997   | 5645   | 5400   | 4943   | 4848   | 28     |
| 305    | 257    | 4665   | 271    | 0      | 325    | 324    | 337    | 336    | 311    | 350    | 361    | 342    | 252    | 410    | 126362 | 4723   | 4723   | 25354  | 5045   | 5687   | 5448   | 4993   | 4917   | 29     |
| 327    | 296    | 4685   | 290    | 325    | 0      | 293    | 320    | 325    | 265    | 306    | 319    | 287    | 260    | 384    | 126366 | 4743   | 4743   | 25371  | 5071   | 5679   | 5440   | 5013   | 4934   | 30     |
| 317    | 274    | 4679   | 267    | 324    | 293    | 0      | 321    | 300    | 259    | 269    | 281    | 255    | 238    | 350    | 126371 | 4737   | 4737   | 25354  | 5053   | 5655   | 5432   | 4995   | 4924   | 31     |
| 291    | 290    | 4647   | 236    | 337    | 320    | 321    | 0      | 312    | 294    | 325    | 325    | 319    | 250    | 397    | 126338 | 4705   | 4705   | 25317  | 5041   | 5691   | 5434   | 4977   | 4890   | 32     |
| 302    | 299    | 4619   | 272    | 336    | 325    | 300    | 312    | 0      | 248    | 285    | 228    | 258    | 230    | 345    | 126310 | 4677   | 4677   | 25304  | 5019   | 5650   | 5385   | 4965   | 4878   | 33     |
| 288    | 283    | 4615   | 260    | 311    | 265    | 259    | 294    | 248    | 0      | 214    | 230    | 195    | 217    | 313    | 126308 | 4673   | 4673   | 25309  | 4997   | 5597   | 5370   | 4943   | 4862   | 34     |
| 322    | 309    | 4652   | 284    | 350    | 306    | 269    | 325    | 285    | 214    | 0      | 225    | 199    | 271    | 304    | 126340 | 4710   | 4710   | 25340  | 5030   | 5629   | 5404   | 4962   | 4865   | 35     |
| 310    | 325    | 4622   | 291    | 361    | 319    | 281    | 325    | 228    | 230    | 225    | 0      | 236    | 235    | 307    | 126320 | 4680   | 4680   | 25314  | 5020   | 5620   | 5369   | 4952   | 4871   | 36     |
| 307    | 305    | 4635   | 275    | 342    | 287    | 255    | 319    | 258    | 195    | 199    | 236    | 0      | 235    | 297    | 126331 | 4693   | 4693   | 25327  | 5029   | 5627   | 5392   | 4971   | 4882   | 55     |
| 237    | 206    | 4579   | 202    | 252    | 260    | 238    | 250    | 230    | 217    | 271    | 235    | 235    | 0      | 326    | 126281 | 4637   | 4637   | 25276  | 4975   | 5603   | 5352   | 4907   | 4846   | 56     |
| 389    | 356    | 4708   | 349    | 410    | 384    | 350    | 397    | 345    | 313    | 304    | 307    | 297    | 326    | 0      | 126387 | 4766   | 4766   | 25367  | 5110   | 5722   | 5477   | 5046   | 4962   | 89     |
| 126342 | 126322 | 124320 | 126311 | 126362 | 126366 | 126371 | 126338 | 126310 | 126308 | 126340 | 126320 | 126331 | 126281 | 126387 | 0      | 124289 | 124289 | 133975 | 126081 | 126619 | 126387 | 125858 | 125762 | 90     |
| 4711   | 4679   | 62     | 4683   | 4723   | 4743   | 4737   | 4705   | 4677   | 4673   | 4710   | 4680   | 4693   | 4637   | 4766   | 124289 | 0      | 0      | 24519  | 3519   | 4290   | 3942   | 3472   | 3255   | BN14   |
| 4711   | 4679   | 62     | 4683   | 4723   | 4743   | 4737   | 4705   | 4677   | 4673   | 4710   | 4680   | 4693   | 4637   | 4766   | 124289 | 0      | 0      | 24519  | 3519   | 4290   | 3942   | 3472   | 3255   | BN16   |
| 25328  | 25304  | 24519  | 25302  | 25354  | 25371  | 25354  | 25317  | 25304  | 25309  | 25340  | 25314  | 25327  | 25276  | 25367  | 133975 | 24519  | 24519  | 0      | 25581  | 25914  | 25488  | 25345  | 25254  | BN7    |
| 5043   | 5019   | 3575   | 4997   | 5045   | 5071   | 5053   | 5041   | 5019   | 4997   | 5030   | 5020   | 5029   | 4975   | 5110   | 126081 | 3519   | 3519   | 25581  | 0      | 4378   | 4301   | 3411   | 3329   | LXMM01 |
| 5695   | 5635   | 4346   | 5645   | 5687   | 5679   | 5655   | 5691   | 5650   | 5597   | 5629   | 5620   | 5627   | 5603   | 5722   | 126619 | 4290   | 4290   | 25914  | 4378   | 0      | 4000   | 3732   | 4122   | MZZV01 |
| 5440   | 5396   | 3998   | 5400   | 5448   | 5440   | 5432   | 5434   | 5385   | 5370   | 5404   | 5369   | 5392   | 5352   | 5477   | 126387 | 3942   | 3942   | 25488  | 4301   | 4000   | 0      | 4113   | 4115   | NBOT01 |
| 4989   | 4949   | 3528   | 4943   | 4993   | 5013   | 4995   | 4977   | 4965   | 4943   | 4962   | 4952   | 4971   | 4907   | 5046   | 125858 | 3472   | 3472   | 25345  | 3411   | 3732   | 4113   | 0      | 515    | VONS01 |
| 4888   | 4873   | 3311   | 4848   | 4917   | 4934   | 4924   | 4890   | 4878   | 4862   | 4865   | 4871   | 4882   | 4846   | 4962   | 125762 | 3255   | 3255   | 25254  | 3329   | 4122   | 4115   | 515    | 0      | VUBS01 |

25 26 27 28 29 30 31 32 33 34 35 36 55 56 89 90 BN14 BN16 BN7 LXMM01 MZZV01 NBOT01 VONS01 VUBS01

ST11
