# Supplementary figures and images for: Pan-Resistome Characterization of Uropathogenic Escherichia coli and Klebsiella pneumoniae Strains Circulating in Uganda and Kenya, Isolated from 2017–2018
Source: MDPI journal article supplement (doi:10.3390/antibiotics10121547), 2021-12-17

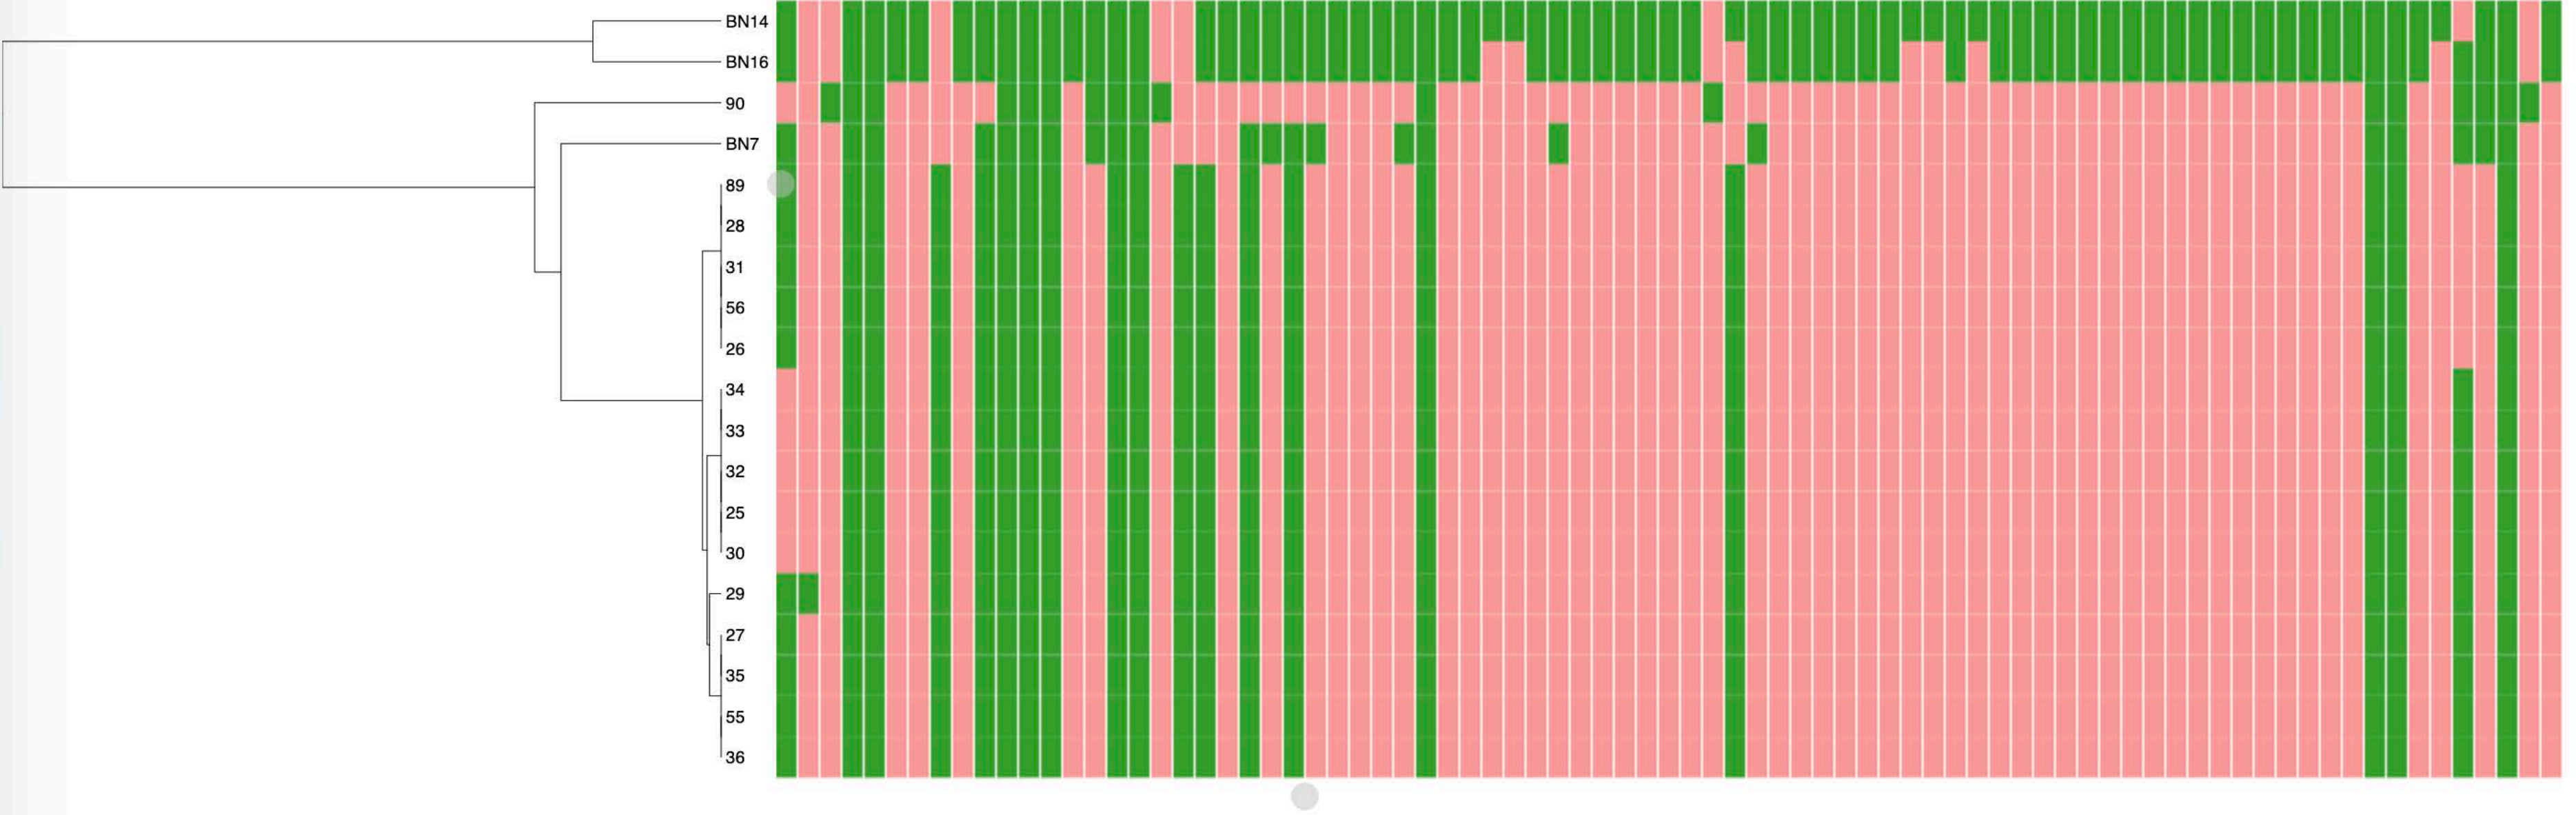

Supplement: s1 [file s1]
